# Supplementary material
Source: Royal Society of Chemistry journal article supplement (https://www.rsc.org/suppdata/cc/1999/2005/905559b.doc)
Supplement: Supplementary file 1 [file 905559b.doc]

# **Supplementary Data**

Functional analysis of phenylalanine 365 in hopene synthase, a conserved amino acid in the families of squalene and oxidosqualene cyclases

**Tsutomu Hoshino* and Tsutomu Sato**

*Department of Applied Biological Chemistry, Faculty of Agriculture,* *and Graduate School of Science and Technology*, *Niigata University, Ikarashi, Niigata 950-2181, Japan. E-mail: hoshitsu@agr.niigata-u.ac.jp*


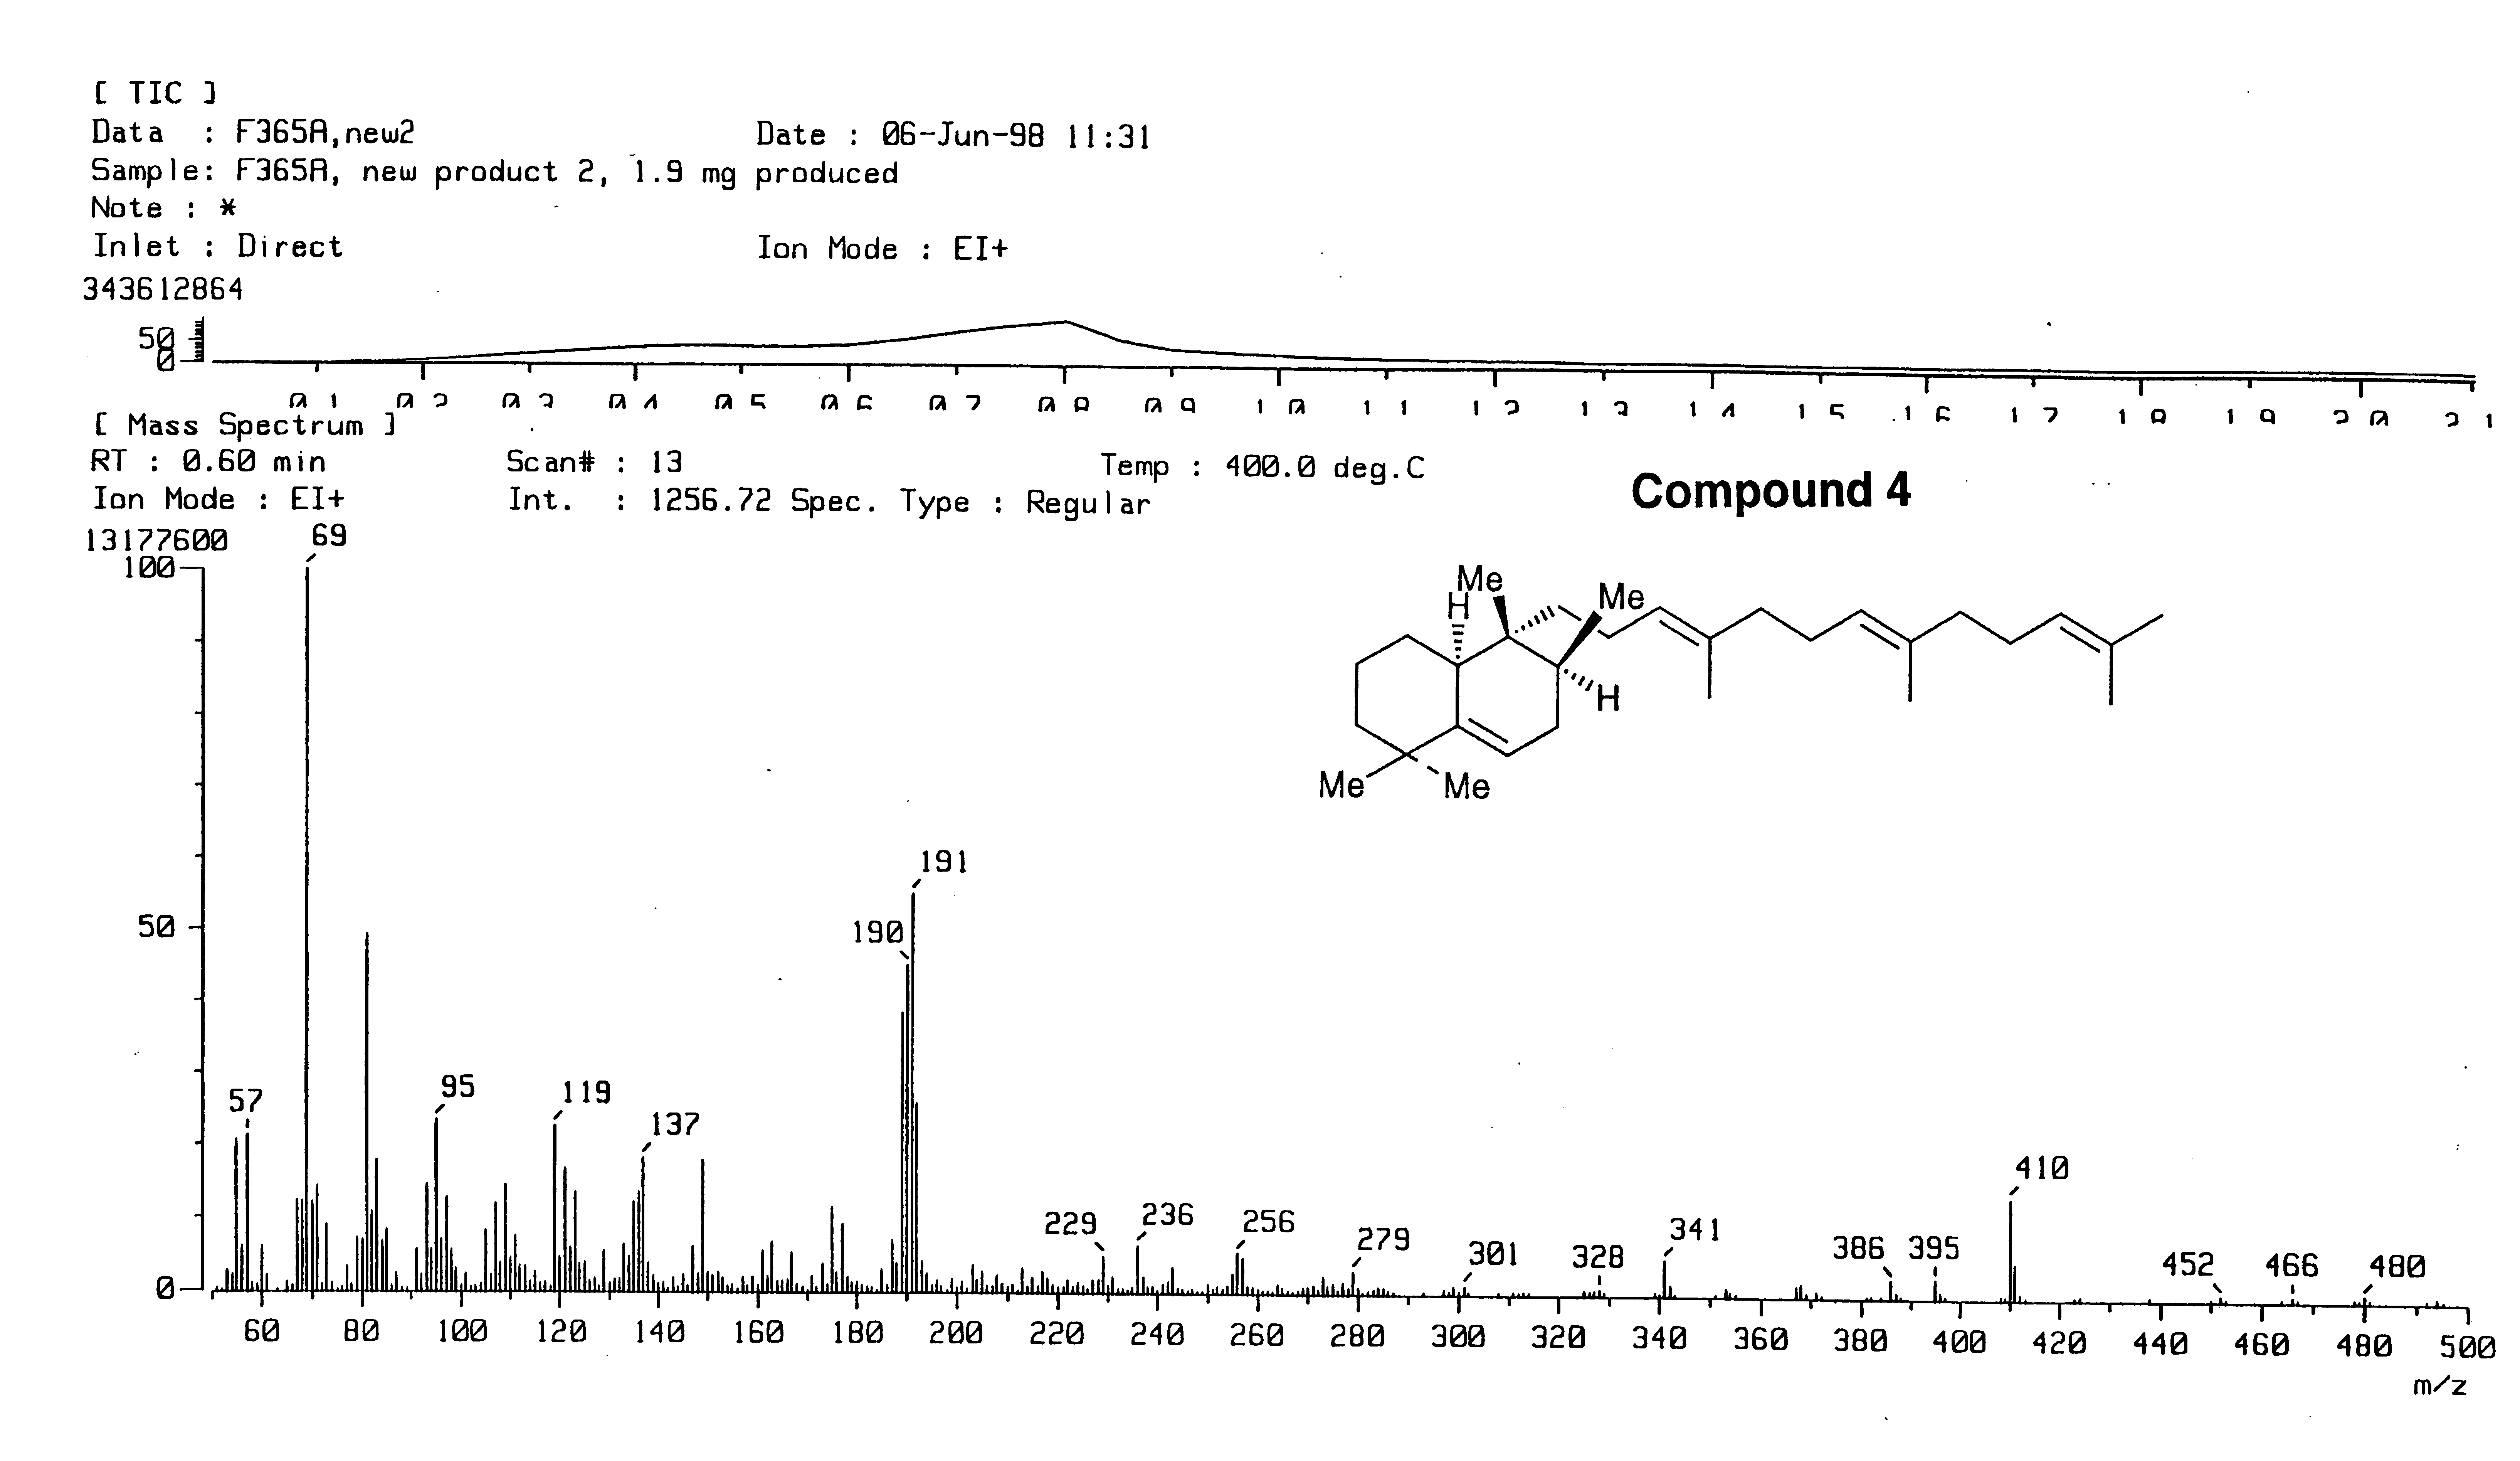


**Fig. 1** EIMS of Compound **4**.


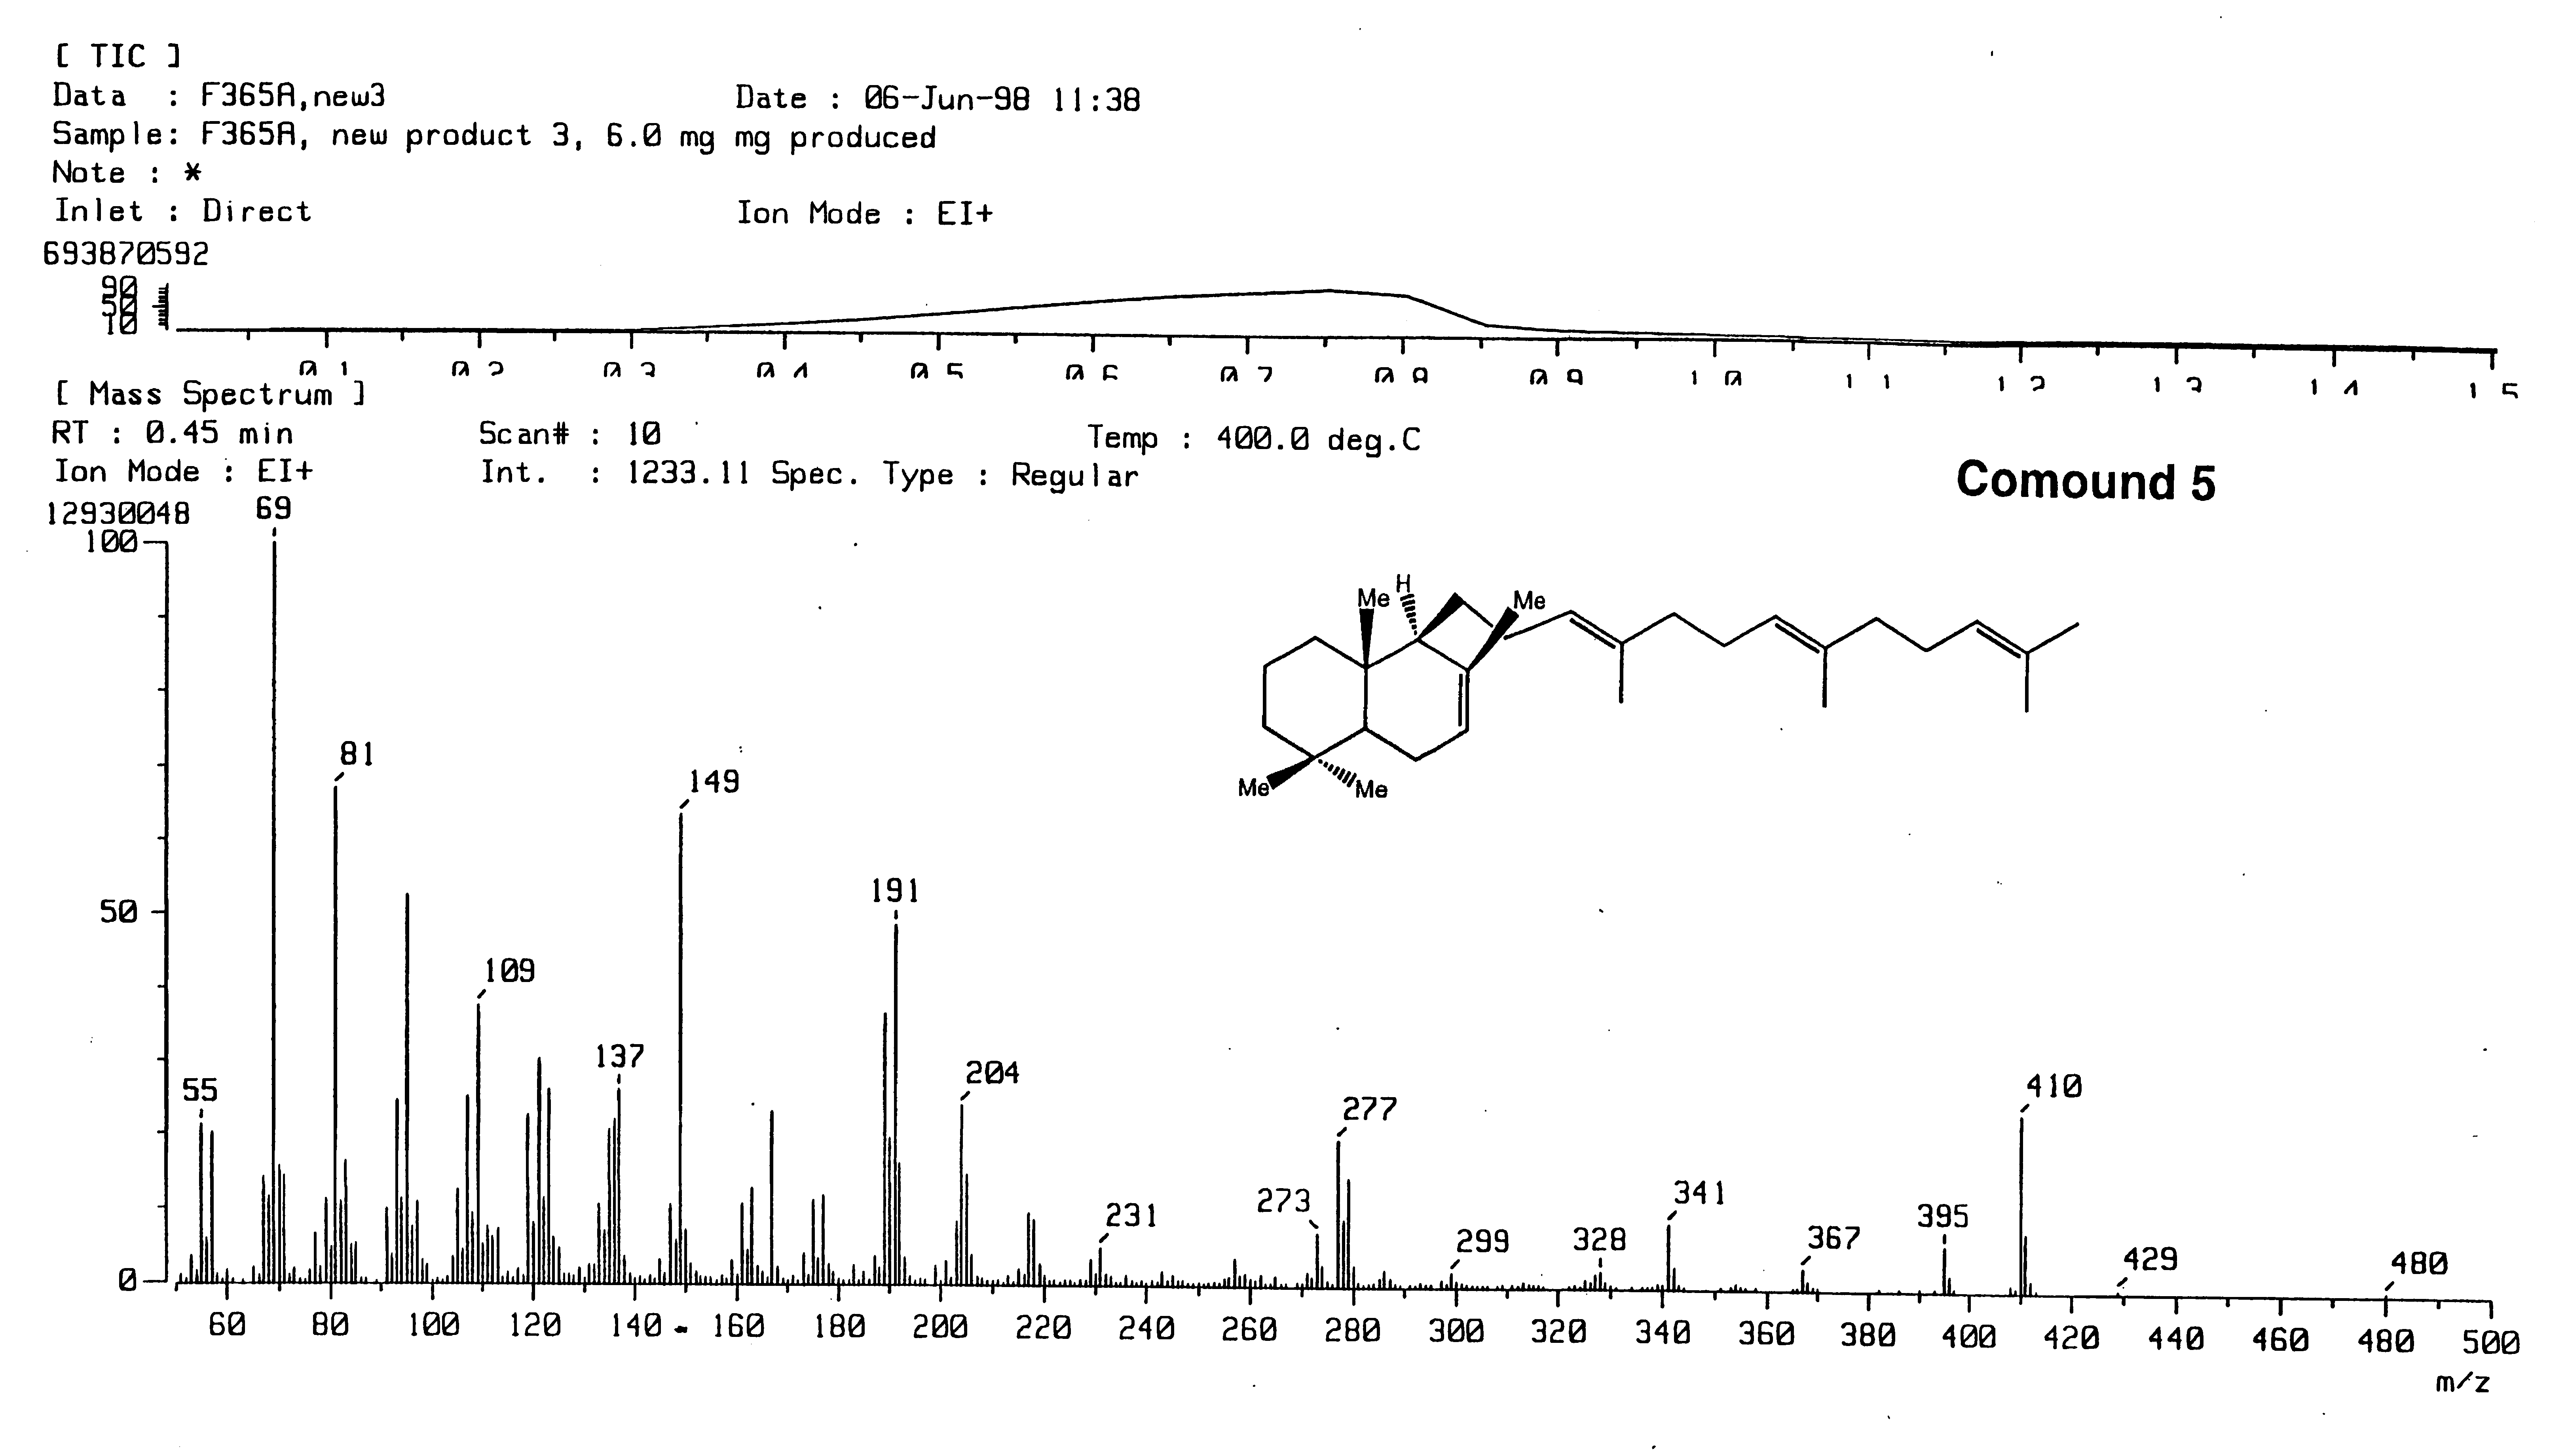


**Fig. 2** EIMS of Compound **5**.


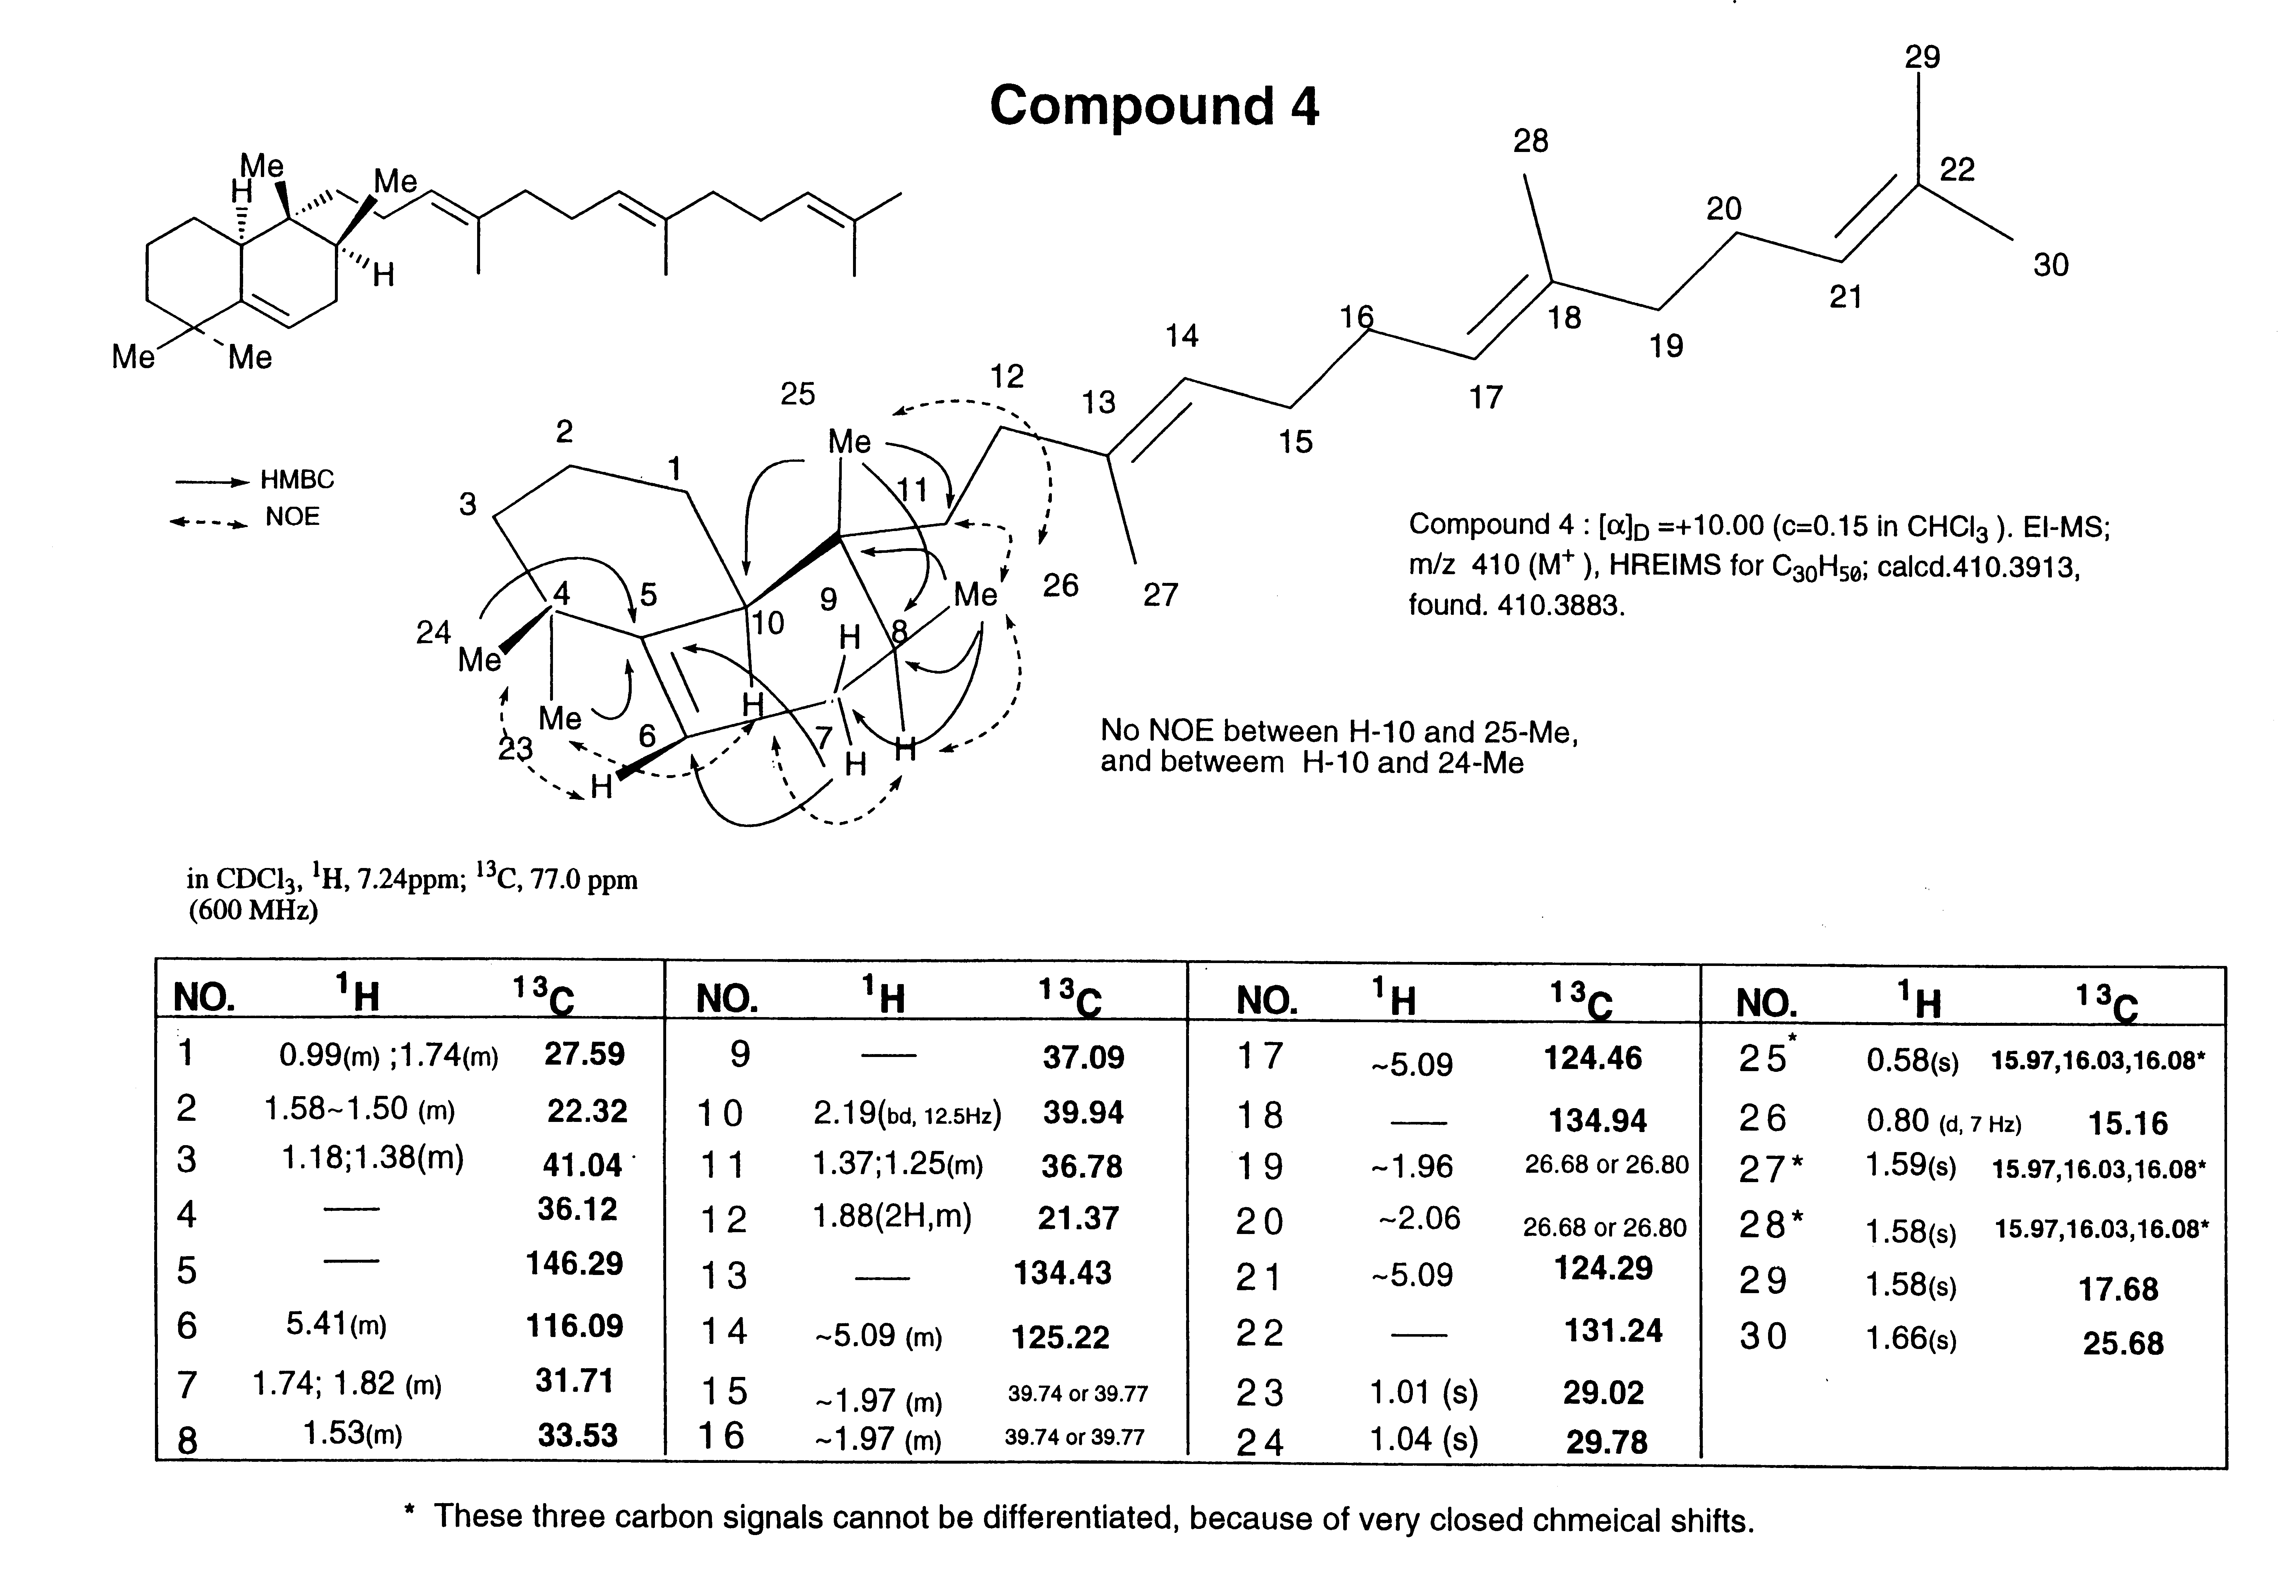


**Fig. 3** Spectroscopic Data of Compound **4**, including [α]D, HR-EIMS and major analyses of NMR data.


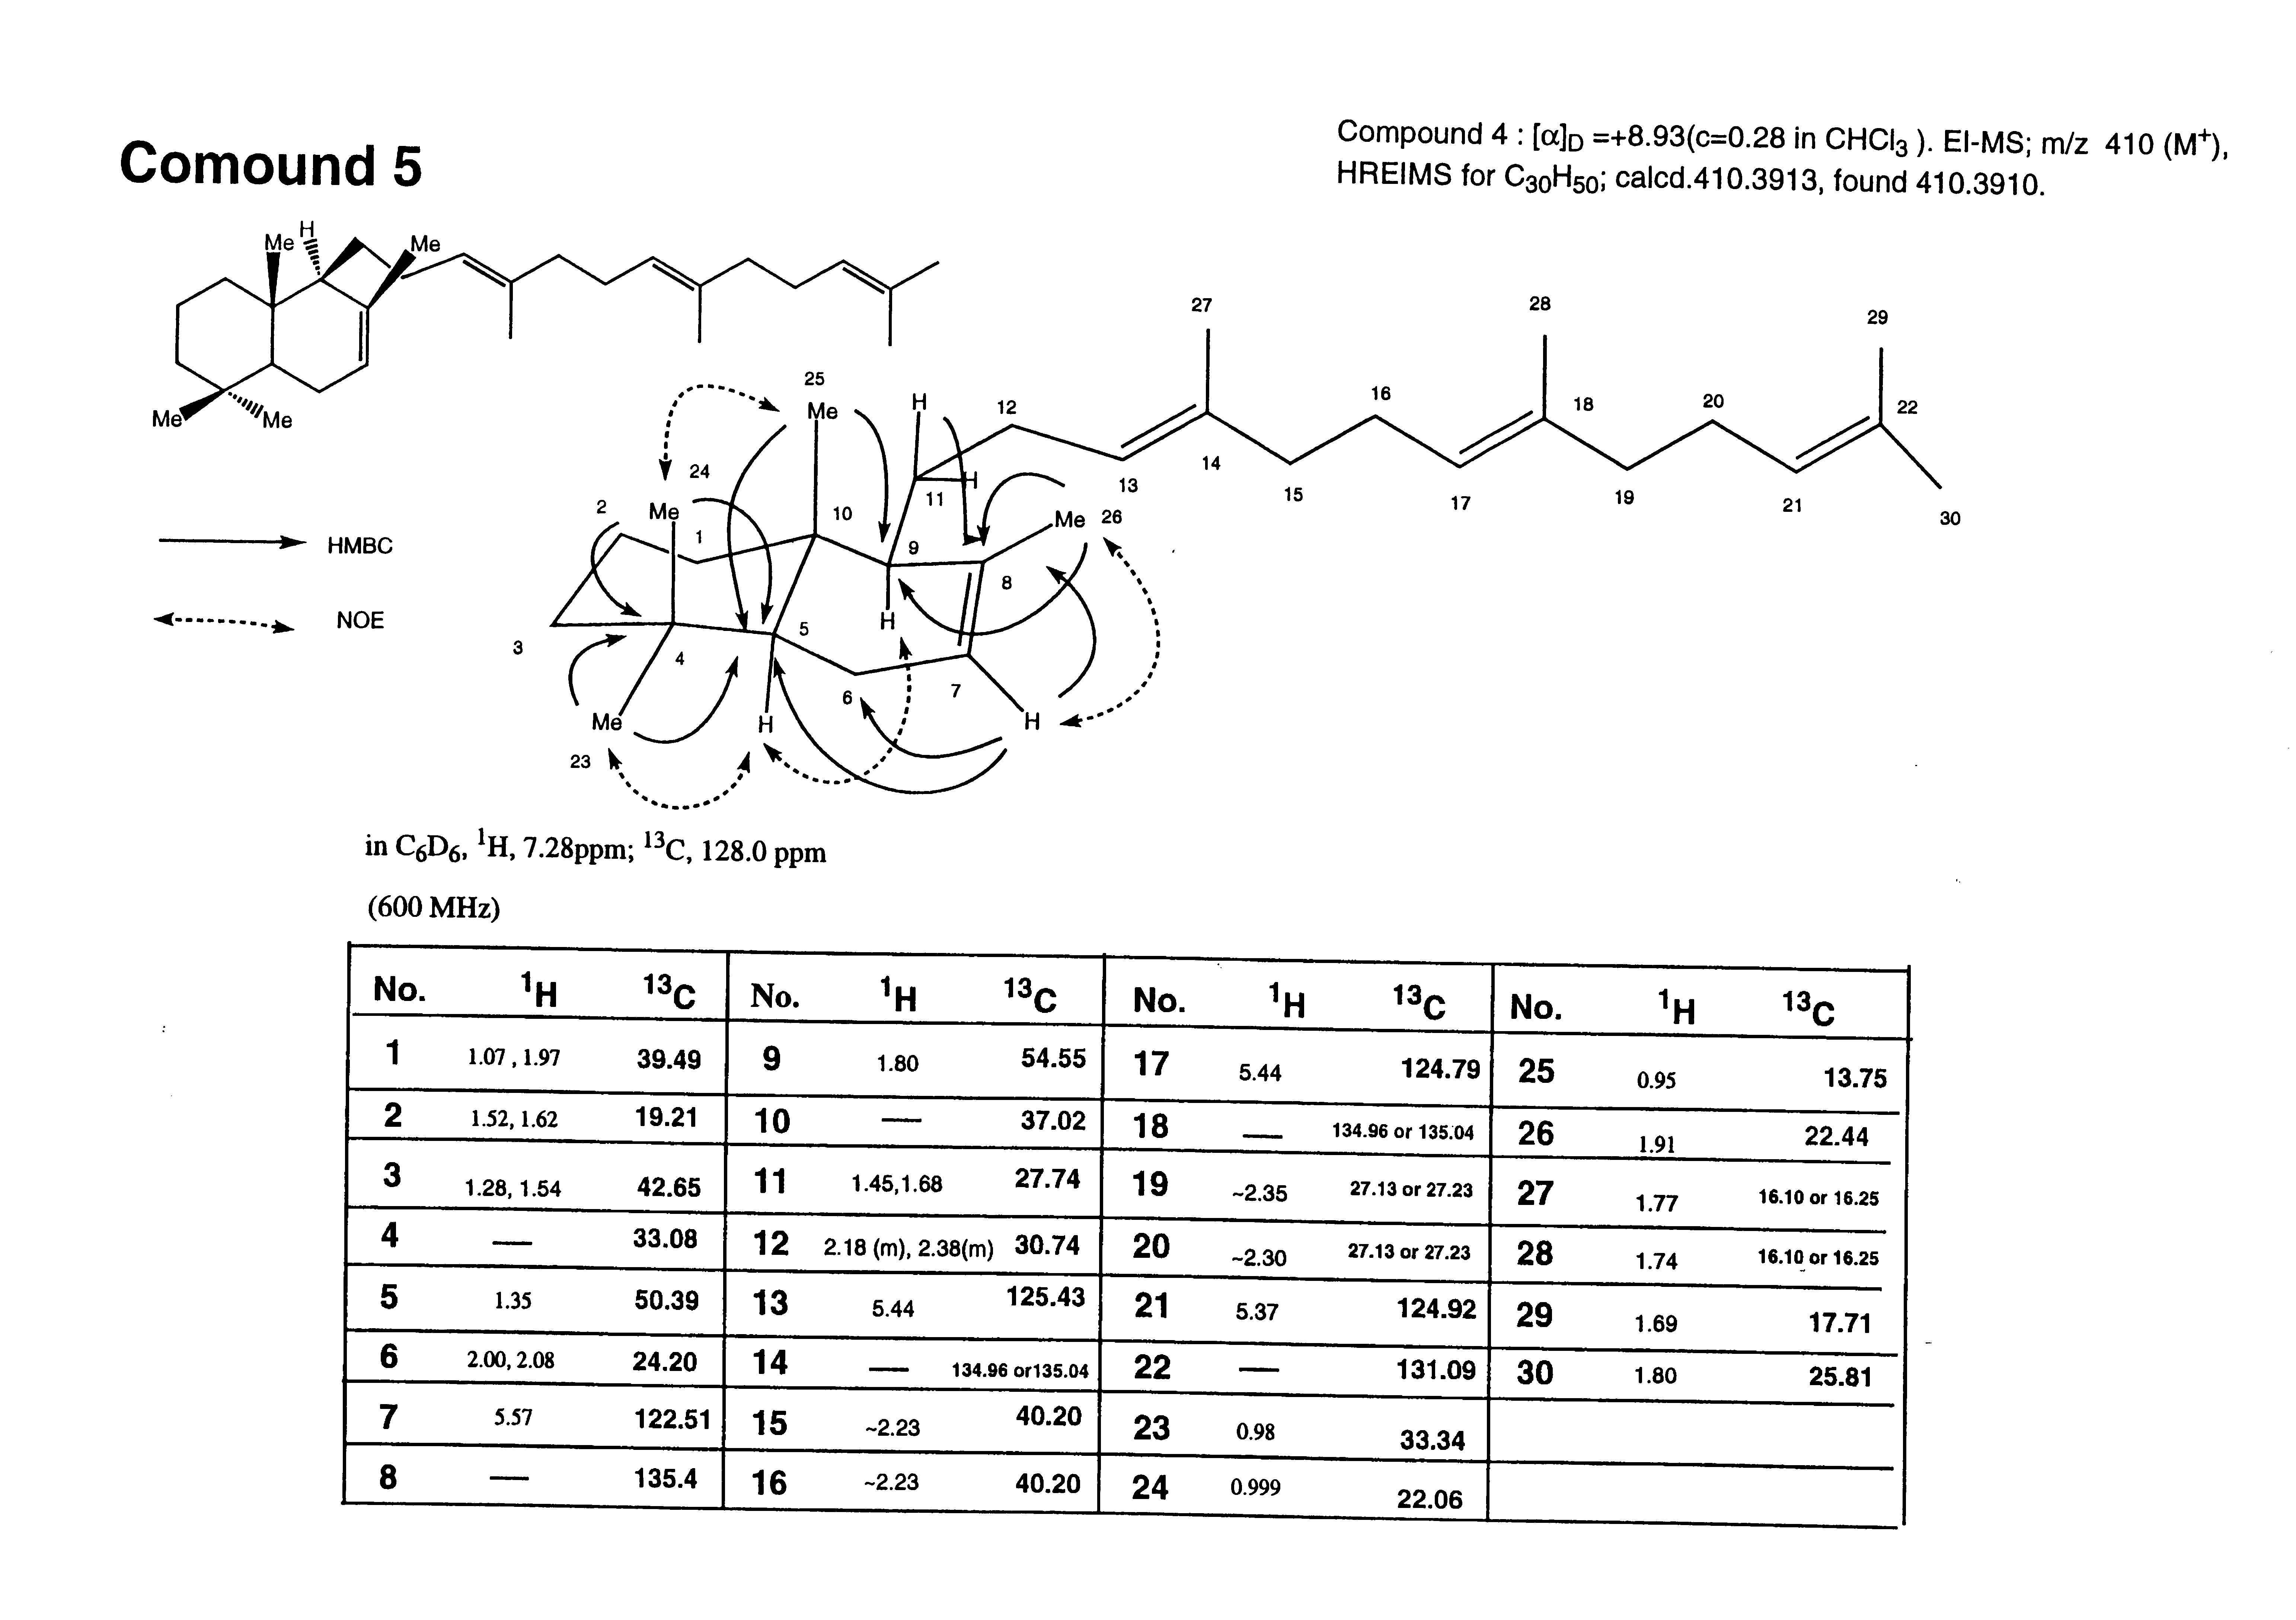


**Fig. 4** Spectroscopic Data of Compound **5**, including [α]D, HR-EIMS and major analyses of NMR data.


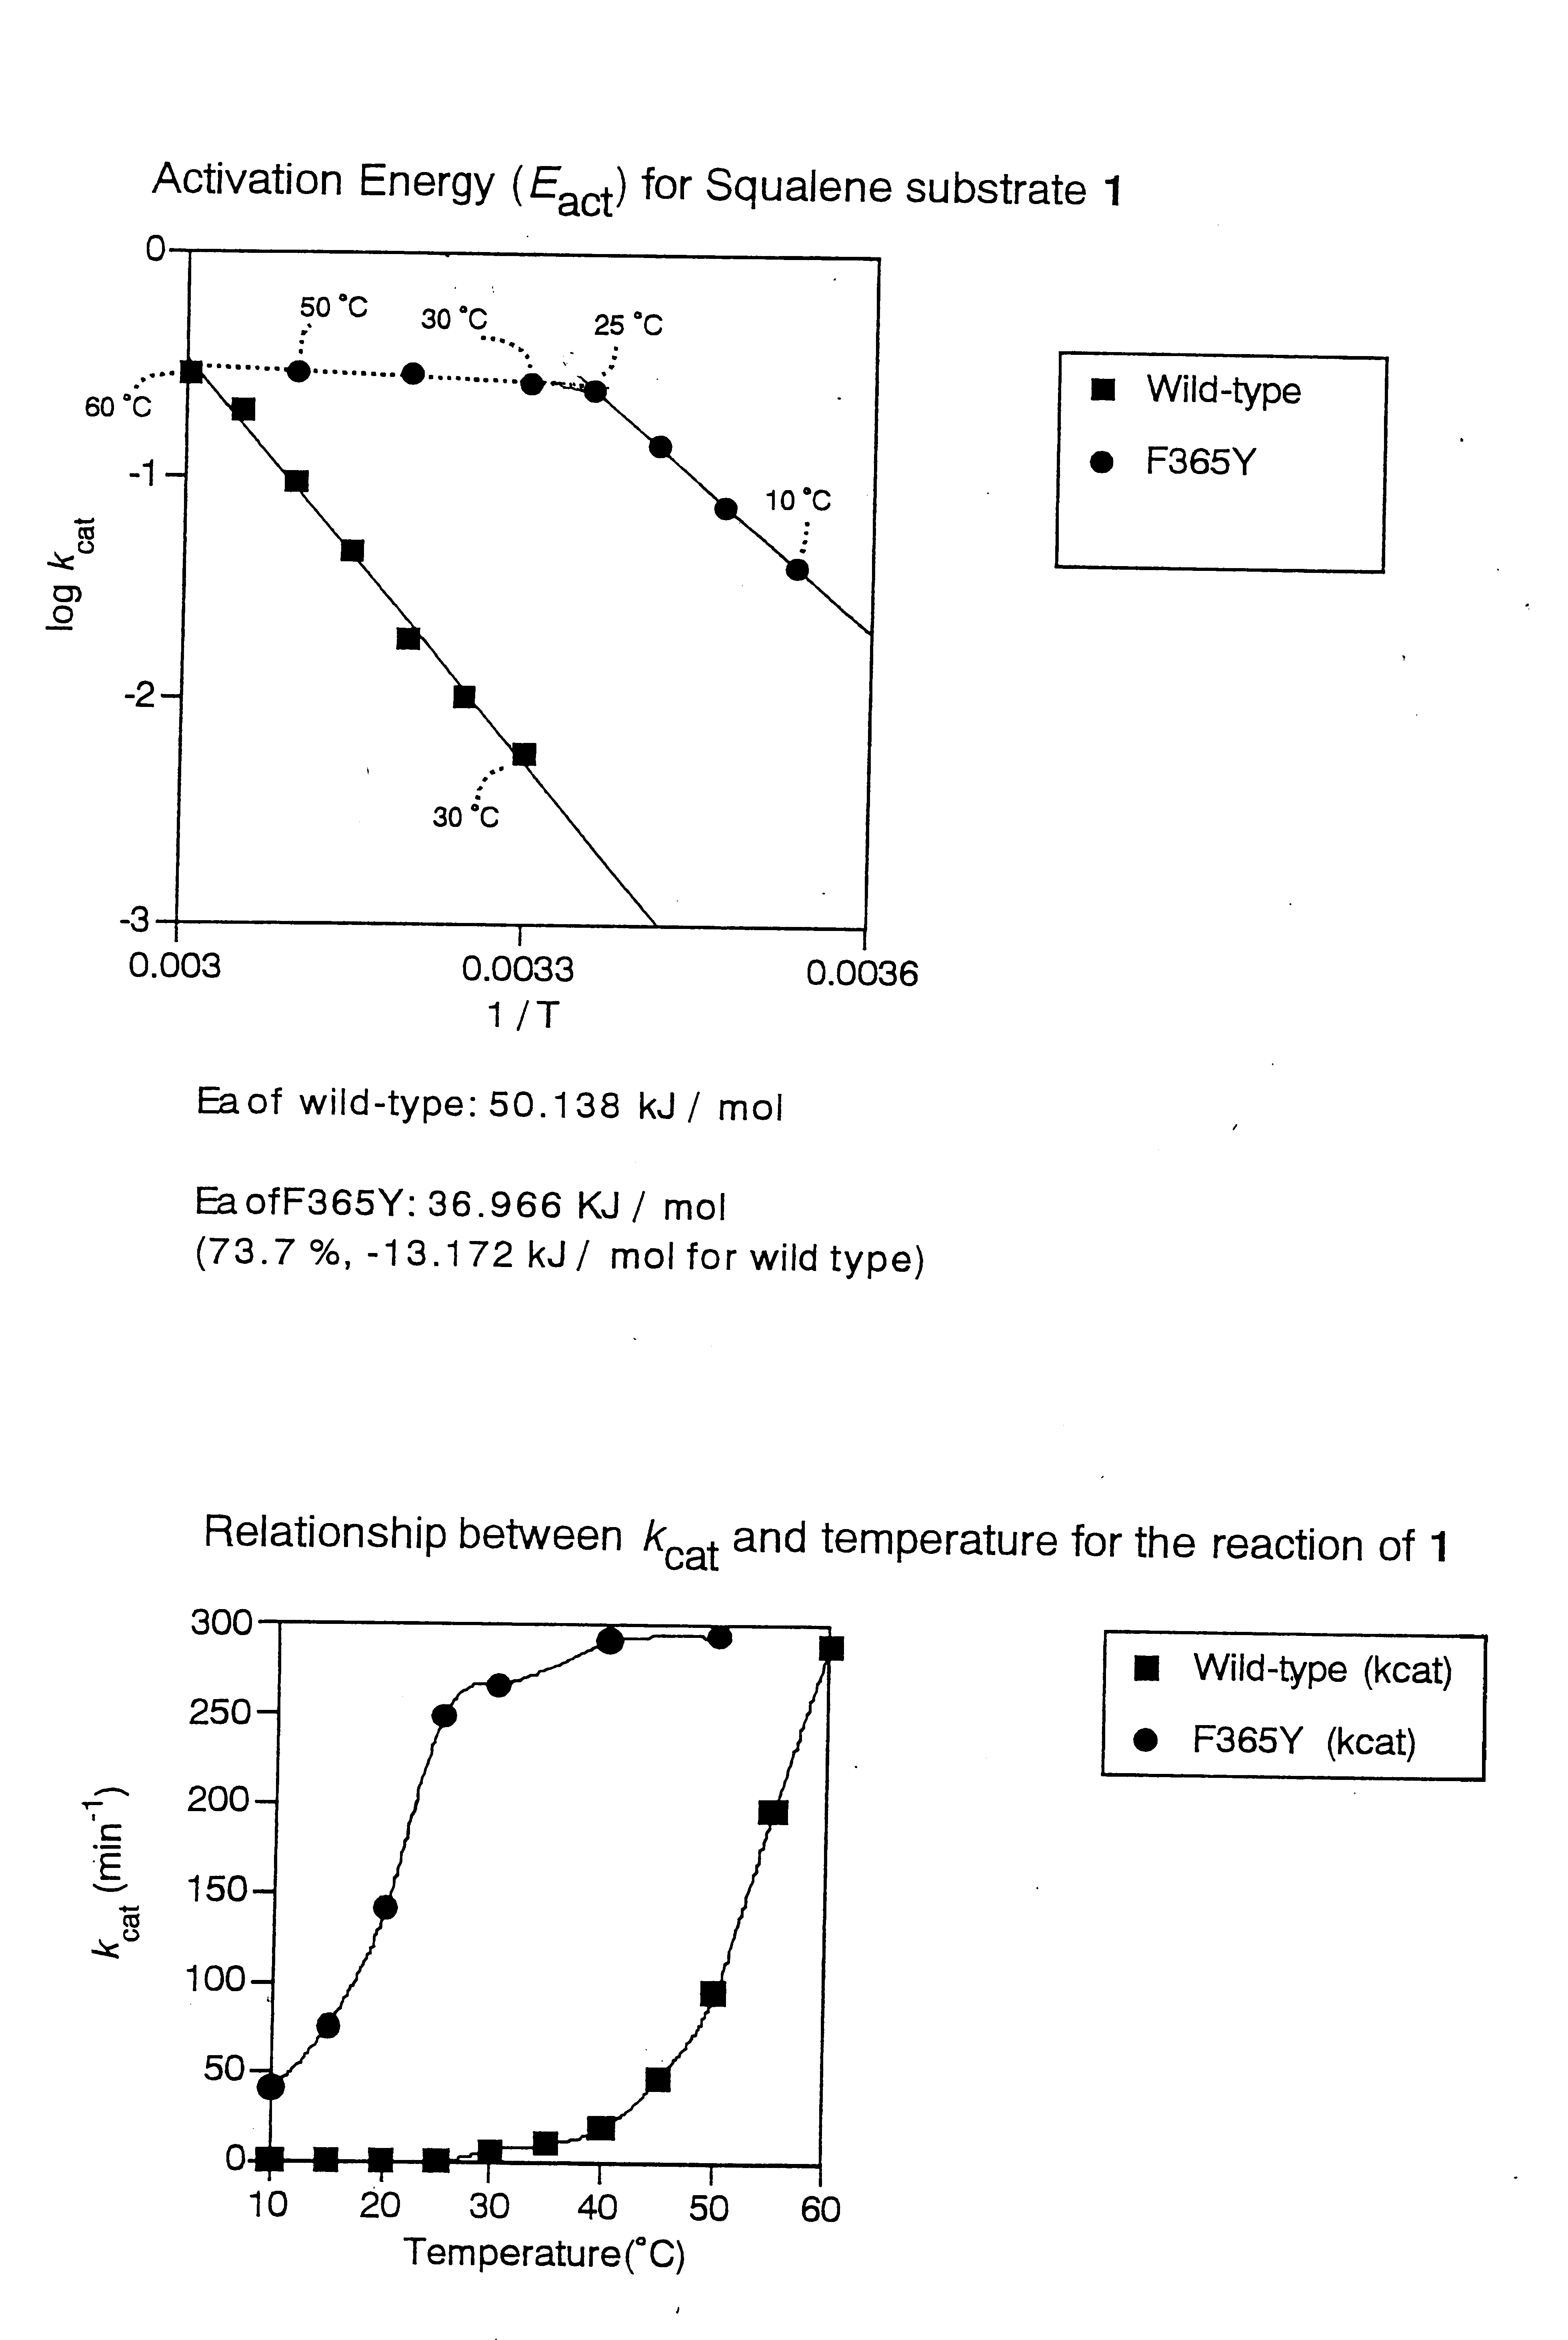


**Fig. 5** Arrhenius plots (log *k*cat against the reciprocal of absolute temperature) for determining the activation energies of the cyclization reaction as for squalene substrate **1**. The temperatures used for the plots were 30-60˚C and 10-25˚C, respectively, for the wild-type and for the F365Y. The activation energy of the mutant F365Y was decreased by 26.3%, compared to that of the wild-type.

Three distinctive phases were observed for the F365Y (Fig. 1 shown in MS): at 10-25°C, the activities increased; at 30-50°C, a steady state; at 55-70°C, decreased due to irreversible thermal denaturation. This means that over the temperatures from 10 to 50°C, Arrhenius plots was not linear (cf. linear at 10-25°C), as shown in Fig. 5. Two possibilities may be taken into account for this phenomenon according to the reference. 12b First one is that the reaction consists of three steps including two types of ES complex. 12b If two types of ES complex are included in enzyme reactions, the plots of log kcat/Km against 1/T should have a straight line, but gave a curvature at the entire range of 10-50°C (Fig. 5). This indicates that two types of ES complex may not be involved in the reactions.12b In general, kcat is increased by increasing temperature, but at the temperatures of 30-50°C, the kcat was not increased. This may suggest that rapid and reversible denaturation (conformational change) could occur at higher temperatures (second possibility which has been described in ref. 12b), 12b and the denaturation may be facilitated due to the more enhanced susceptibility of the mutants to the much high energy released by the polycyclization reaction,5 which may be attributable to the largely increased Km  (local geometrical change). A much higher energy would be released, for a given incubation time, by the reaction of **1** than that by **6**, because of the faster reaction of **1** than that of **6**. 6c, 11 The optimal temperature of the wild-type for the reaction of **6** (64°C) was higher than that for **1** (60°C), further supporting that the denaturation for the reaction of **6** is in a lesser amount than for **1**. 6c Therefore, the F365Y also likely undergoes the more remarkable denaturation for the reaction of **1**, compared to that of **6**, which may result from the higher Km for **1** (502 M) than that for **6** (182 M). 11 This may have led to unusual profile for **1**, but usual one for **6** for the F365Y (Fig. 1 shown the MS). If the denaturation could not occur, the kcat could be greatly increased. This idea would be also true for the case of **6** by the F365W (Km =357 M). 11 However, further evidence is required to confrim whether this hypothesis is valid or not.


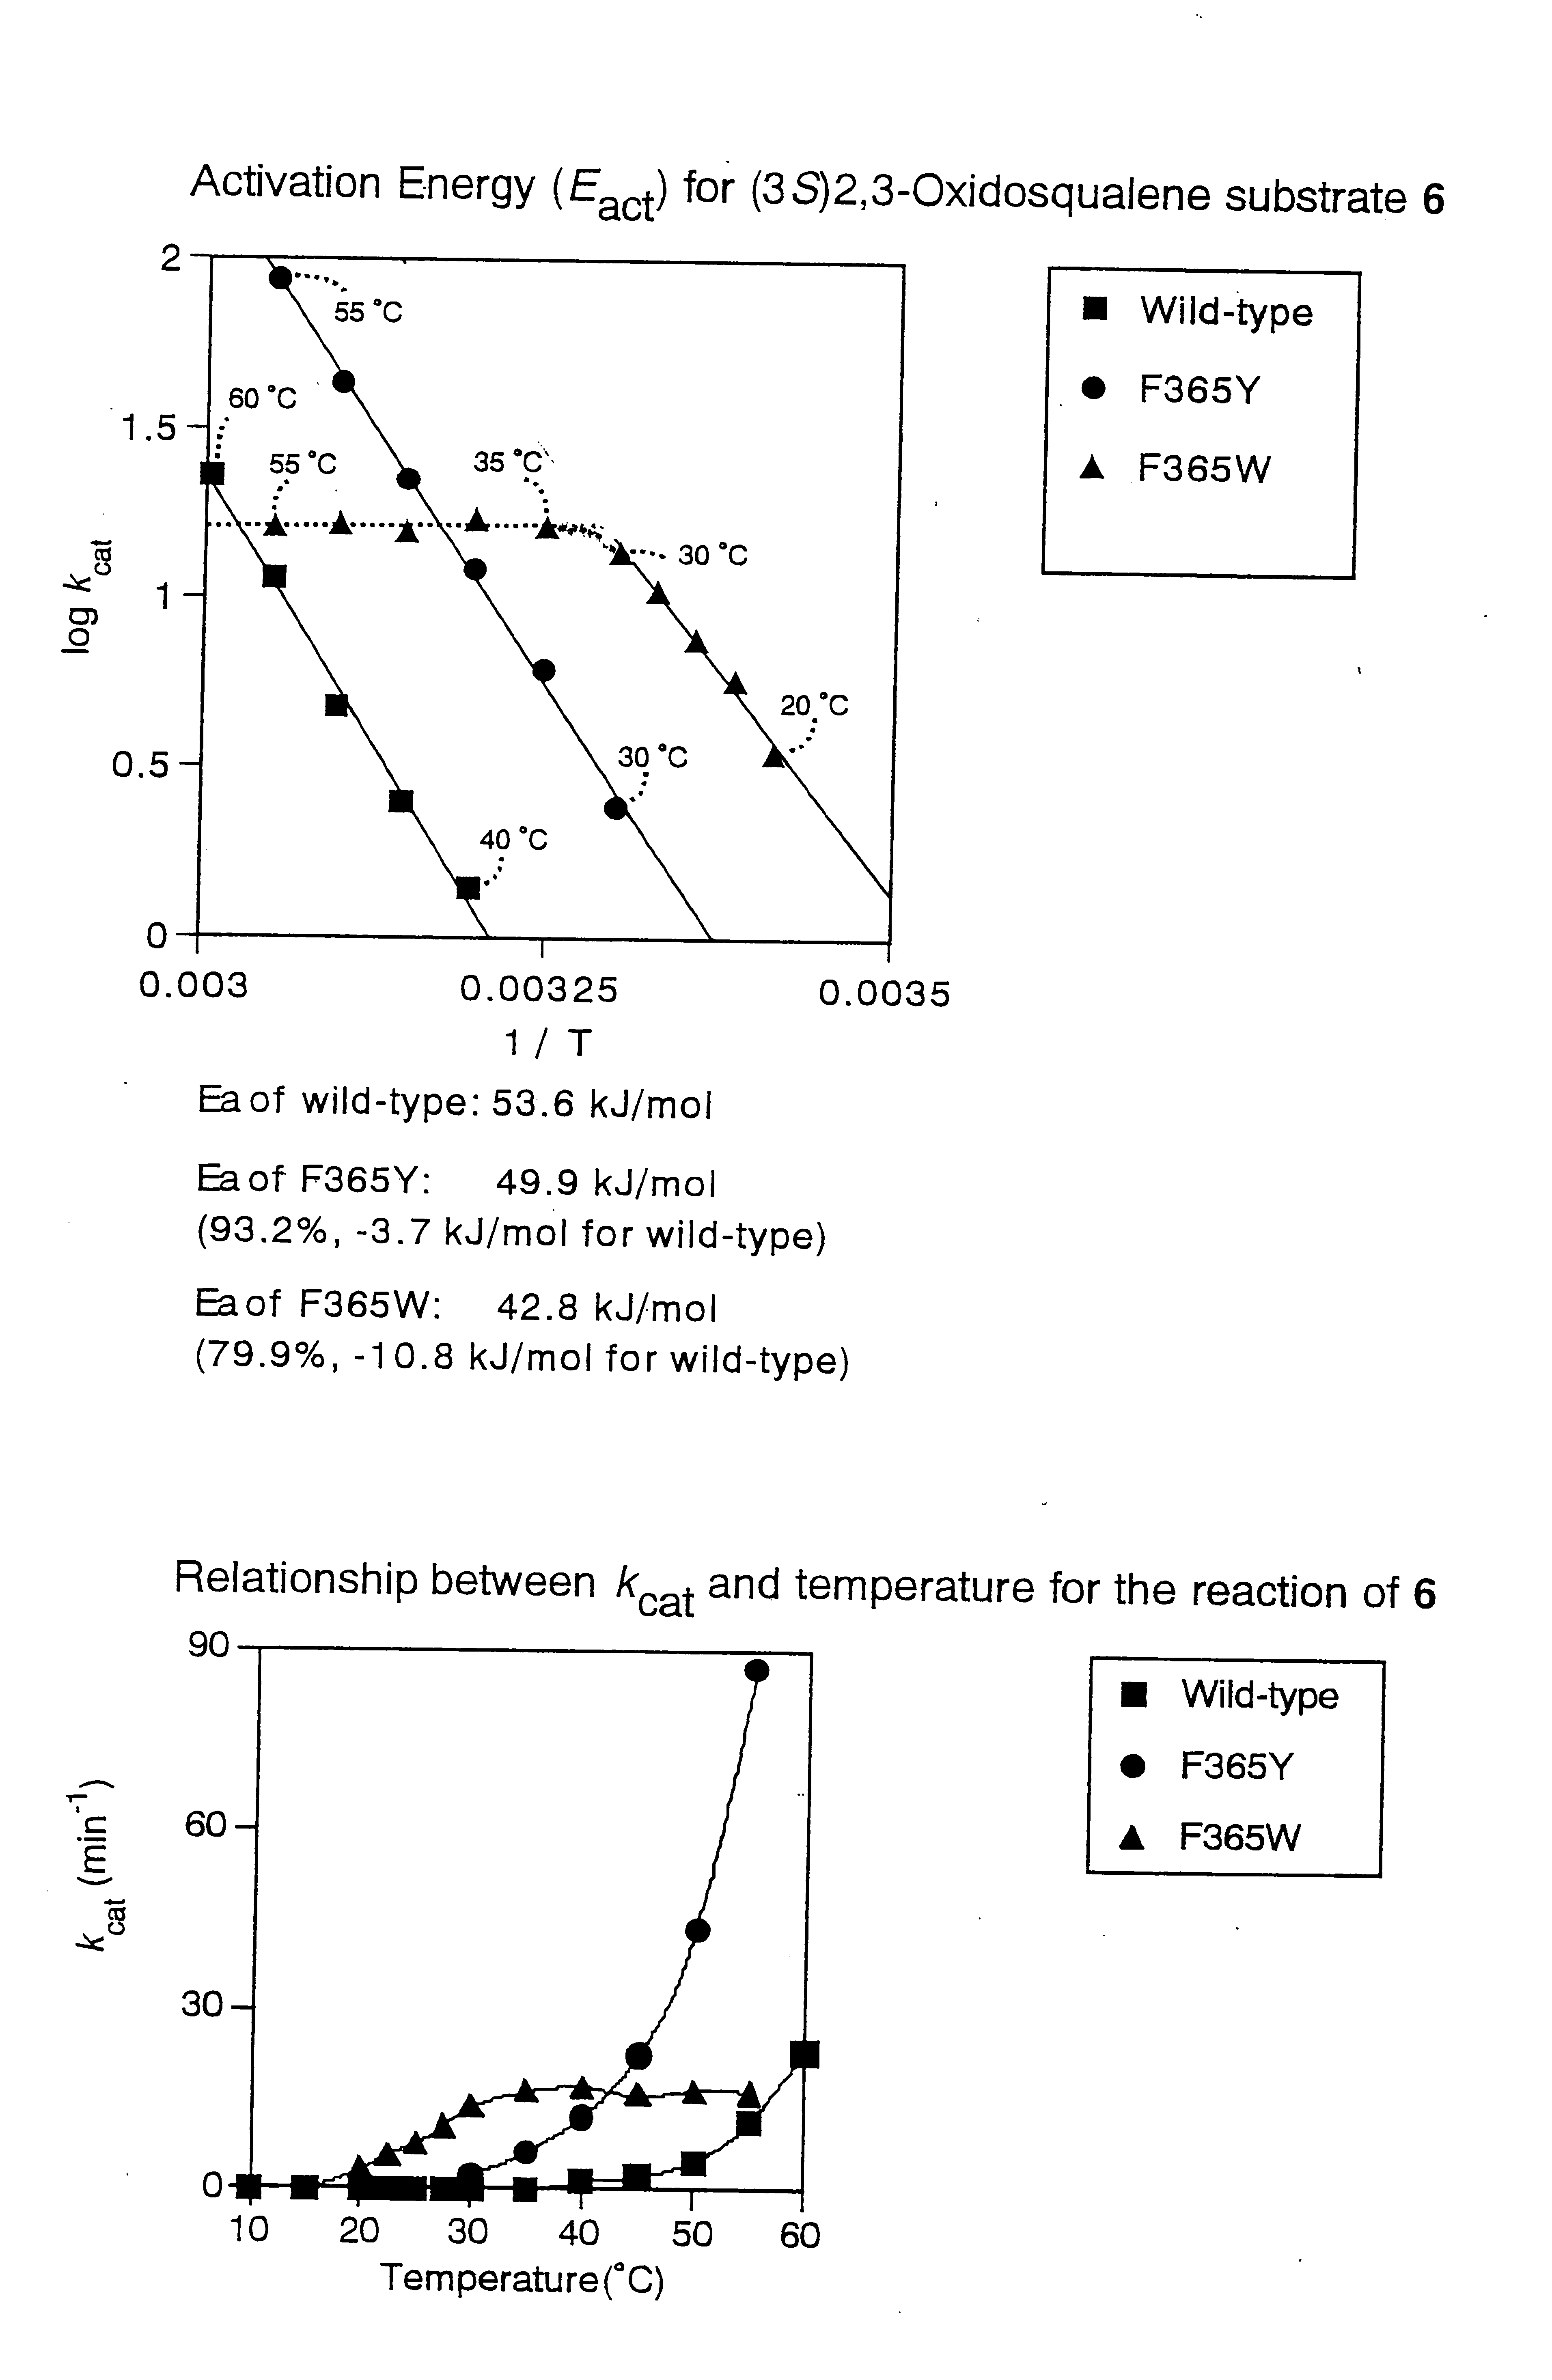


**Fig. 6** Arrhenius plots for determining the activation energies of the cyclization reaction with respect to (3*S*)-oxidosqualene substrate **6**. The temperatures used for the plots were in the range of 40-60˚C, 30-50˚C and 20-30˚C, respectively, for the wild-type, the F365Y and the F365W.


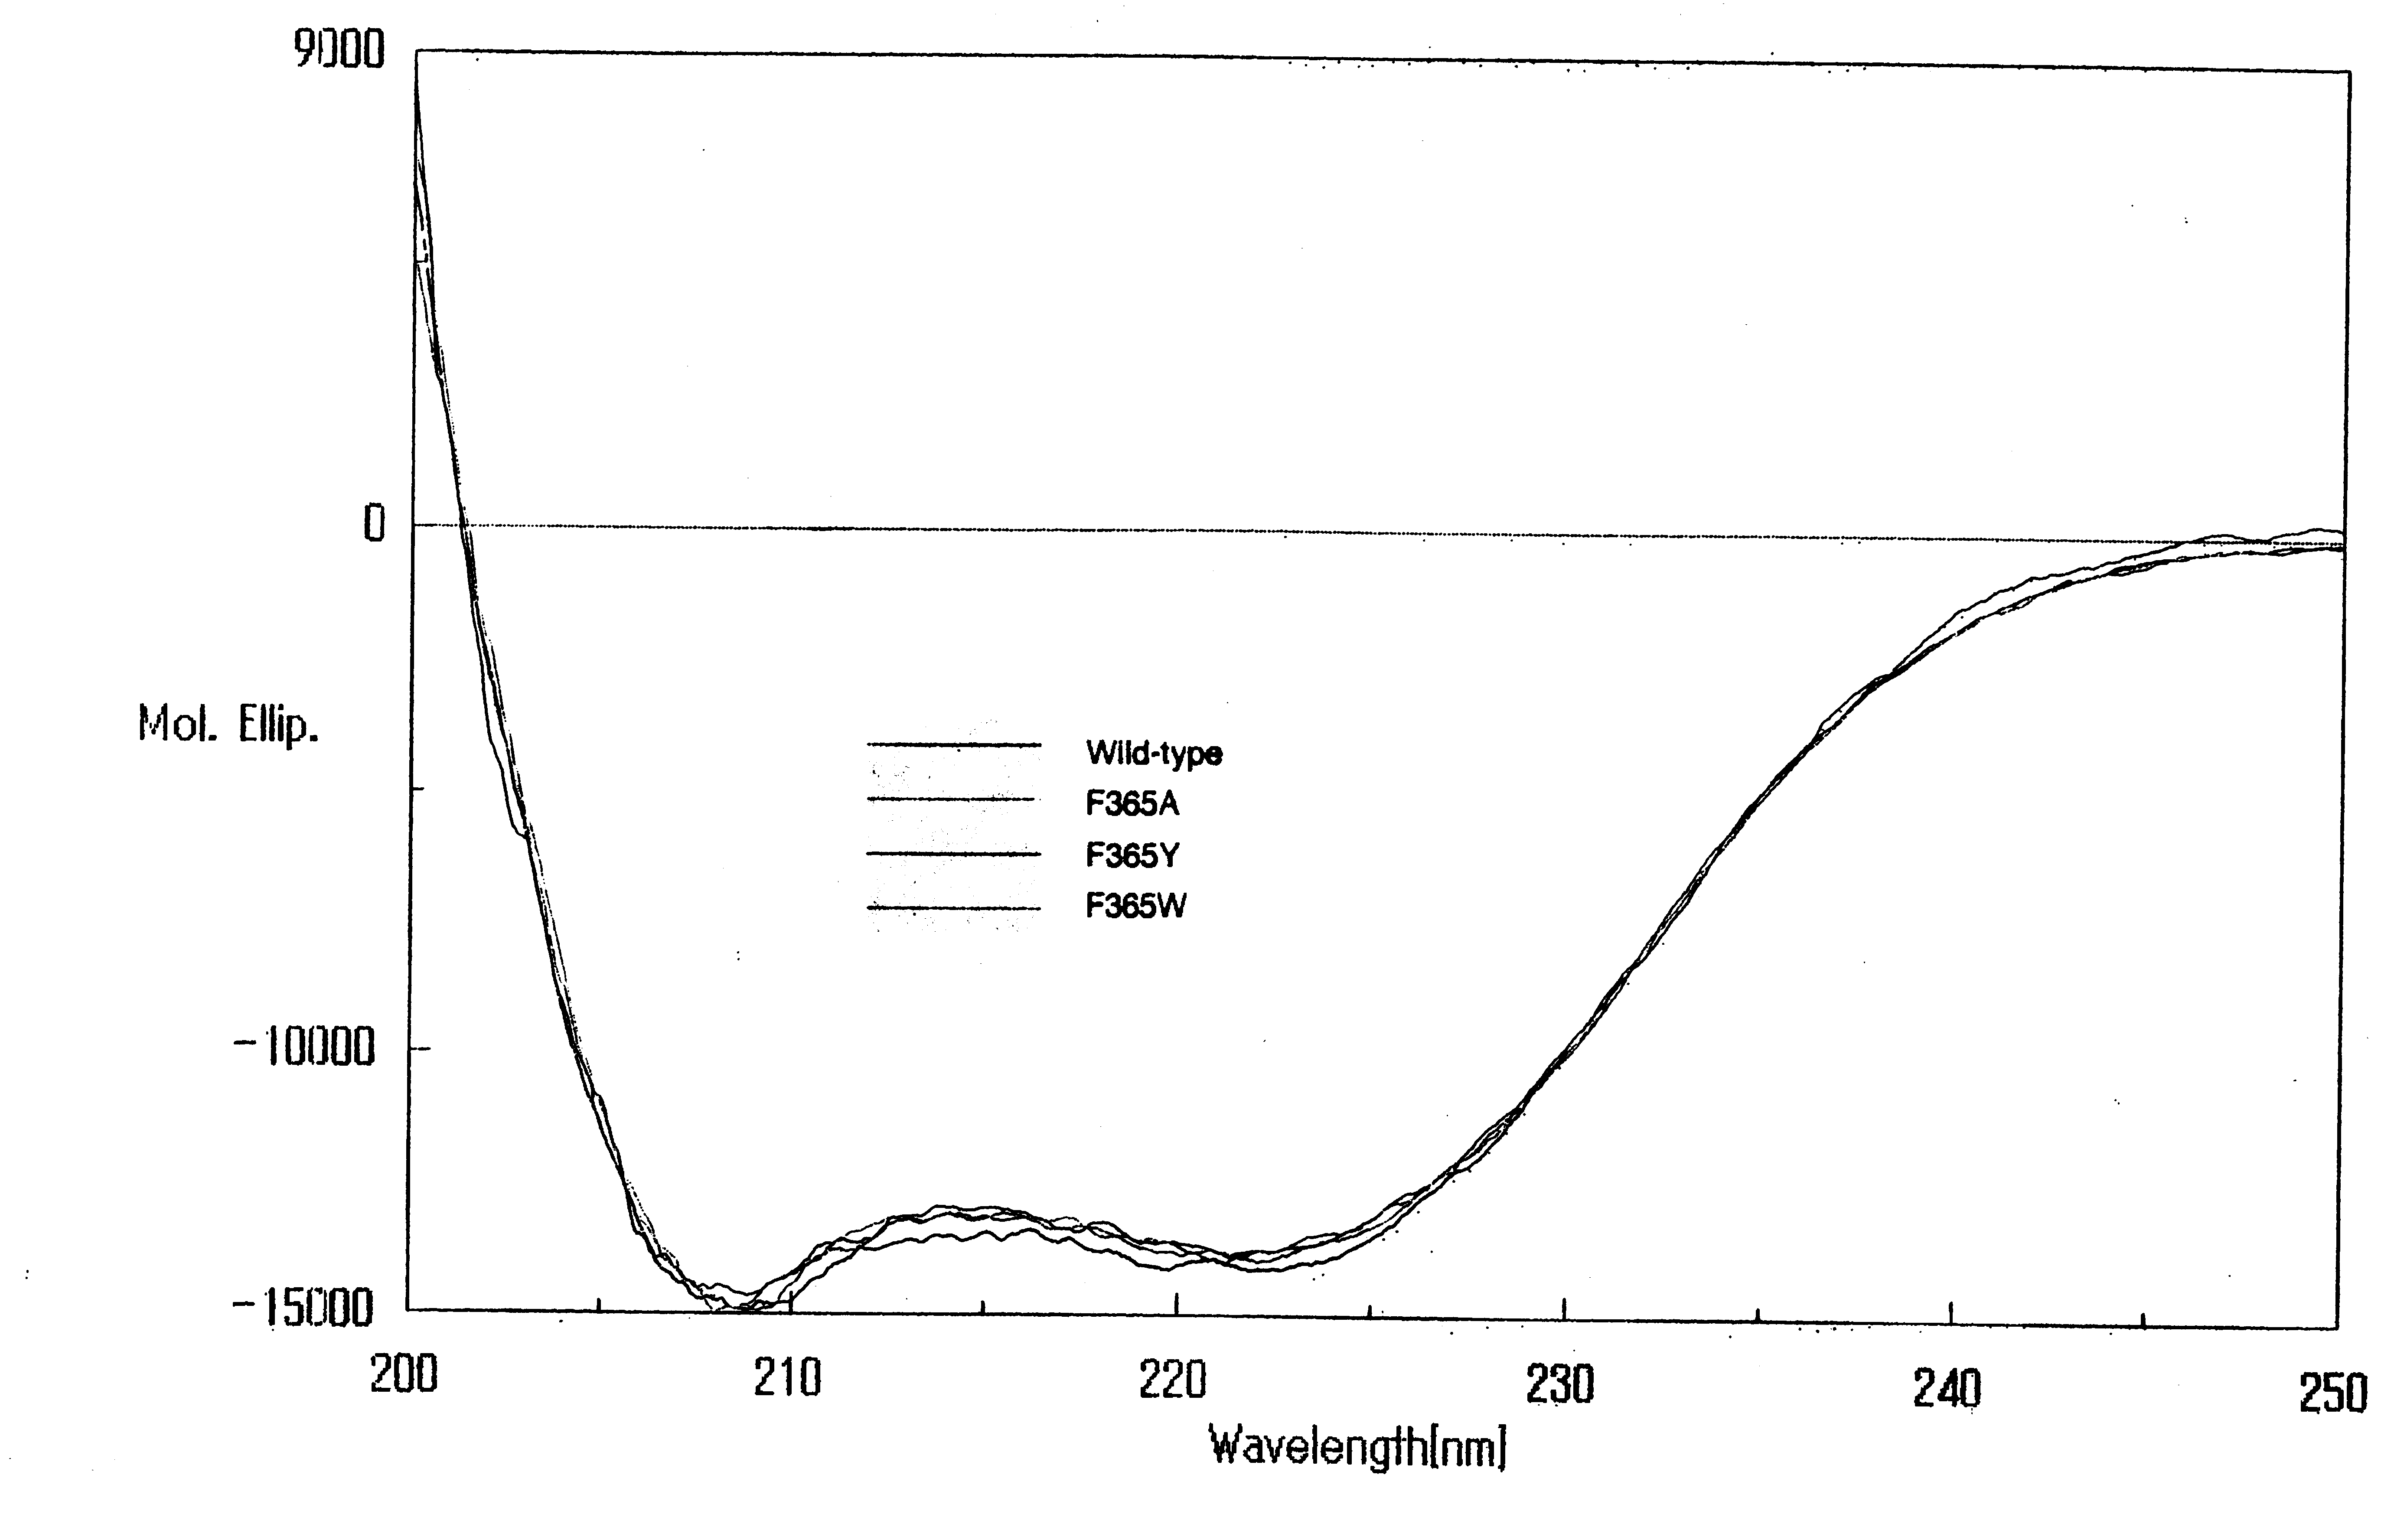


**Fig. 7** CD spectra of the wild-type and the mutated SHCs (F365A, F365Y and F365W), measured at 20°C in the aq. solution of Na-Phosphate buffer (pH 6.0) containing 0.6% Brij 35 C12E23 and 150 mM NaCl.
